# Supplementary material for: Synthesis of olefins by selective hydrodeoxygenation of lignocellulosic ketones
Source: Royal Society of Chemistry journal article supplement (doi:10.1039/d2gc04057c), 2022-12-27
Supplement: d2gc04057c1.pdf [file d2gc04057c1.pdf]

## Supplementary Material

# **Synthesis of olefins by the selective hydrodeoxygenation of lignocellulosic ketones**

Fengan Han<sup>a,b</sup>, Yanting Liu<sup>b</sup>, Guangyi Li<sup>b</sup>, Lin Yuan<sup>b,c</sup>, Aiqin Wang<sup>b,d</sup>, Feng Wang<sup>d</sup>,  
Tao Zhang<sup>a,b,d</sup> and Ning Li<sup>b\*</sup>

<sup>a</sup> Department of Chemical Physics, School of Chemistry and Materials Science,  
University of Science and Technology of China, Hefei 230026, China.

<sup>b</sup> CAS Key Laboratory of Science and Technology on Applied Catalysis, Dalian  
Institute of Chemical Physics, Chinese Academy of Sciences, Dalian 116023, China.

<sup>c</sup> University of Chinese Academy of Sciences, 19 A Yuquan Road, Shijingshan District,  
Beijing 100049, China.

<sup>d</sup> State Key Laboratory of Catalysis, Dalian Institute of Chemical Physics, Chinese  
Academy of Sciences, Dalian 116023, China.

\* Corresponding author's E-mail address: lining@dicp.ac.cn (Ning Li).

## The fundamental principle of evaporation method:

According to the previous literature<sup>1</sup> and Fig. S1, the fundamental principle of evaporation method to manufacture zinc molybdate ( $\text{ZnMoO}_4\text{-E}$ ) can be described by the following reactions:

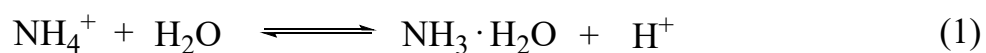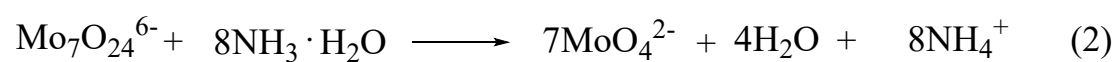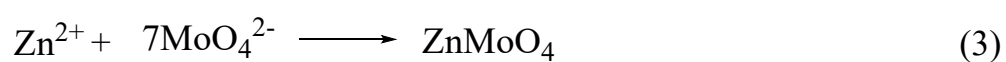

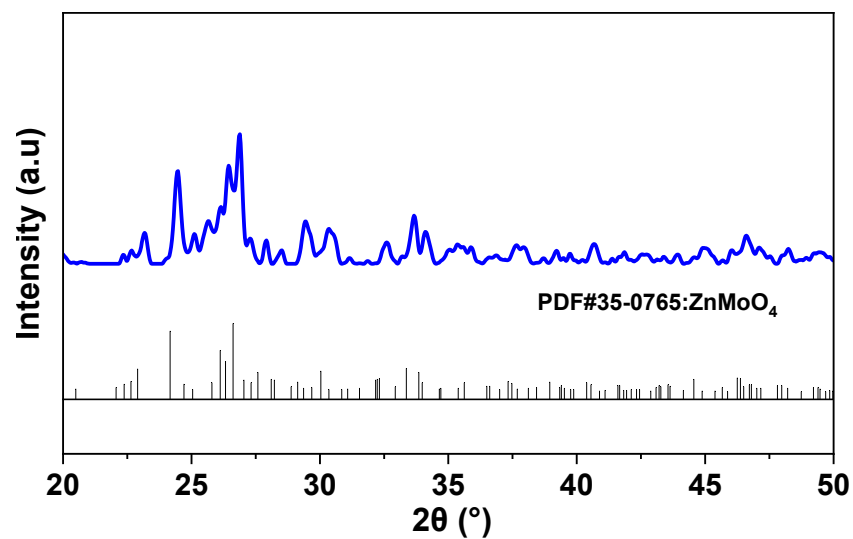

**Fig. S1.** The XRD pattern of the ZnMoO<sub>4</sub>-E catalyst precursor before calcination.

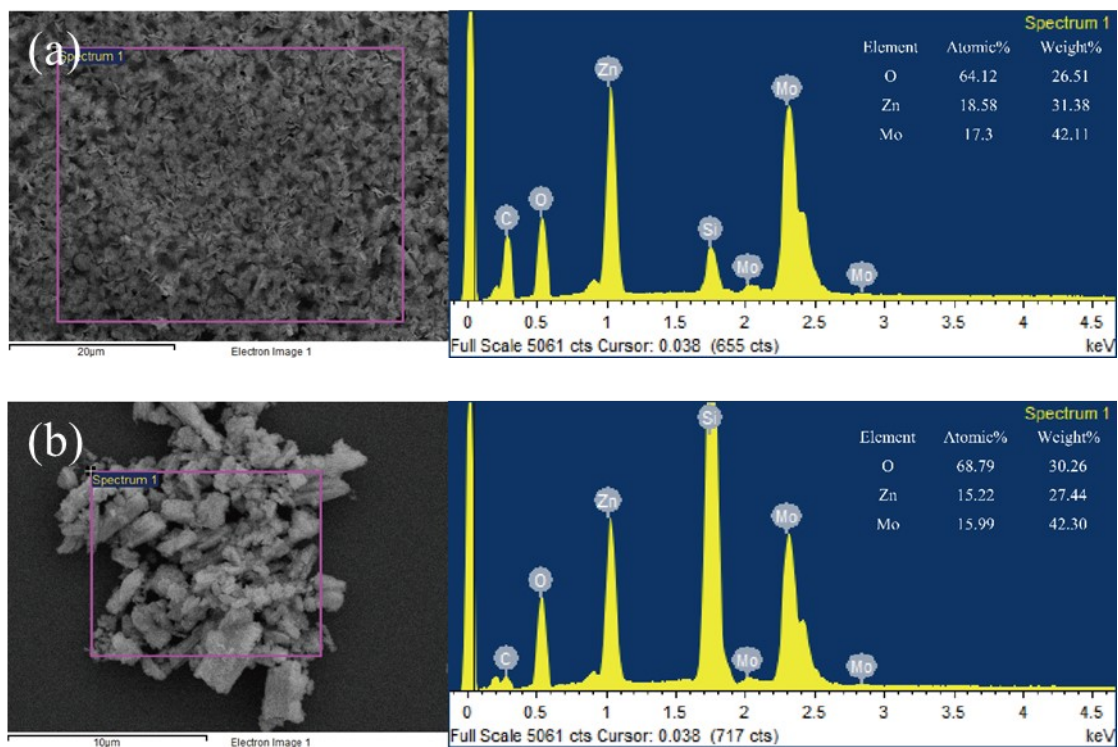

**Fig. S2.** SEM-EDX spectrum of the reduced (a) ZnMoO<sub>4</sub>-CP and (b) ZnMoO<sub>4</sub>-E catalysts.

**Table S1.** Specific BET surface areas, pore volumes and average pore sizes of the reduced ZnO, MoO<sub>3</sub>, ZnMoO<sub>4</sub>-CP and ZnMoO<sub>4</sub>-E catalysts.

| Catalyst               | $S_{\text{BET}}$ (m <sup>2</sup> g <sup>-1</sup> ) | Pore volume (μL g <sup>-1</sup> ) | Average pore size (nm) |
|------------------------|----------------------------------------------------|-----------------------------------|------------------------|
| ZnO                    | 11.5                                               | 15.8                              | 2.7                    |
| MoO <sub>3</sub>       | 1.5                                                | --                                | --                     |
| ZnMoO <sub>4</sub> -CP | 54.5                                               | 81.1                              | 3.5                    |
| ZnMoO <sub>4</sub> -E  | 17.9                                               | 19.5                              | 3.7                    |

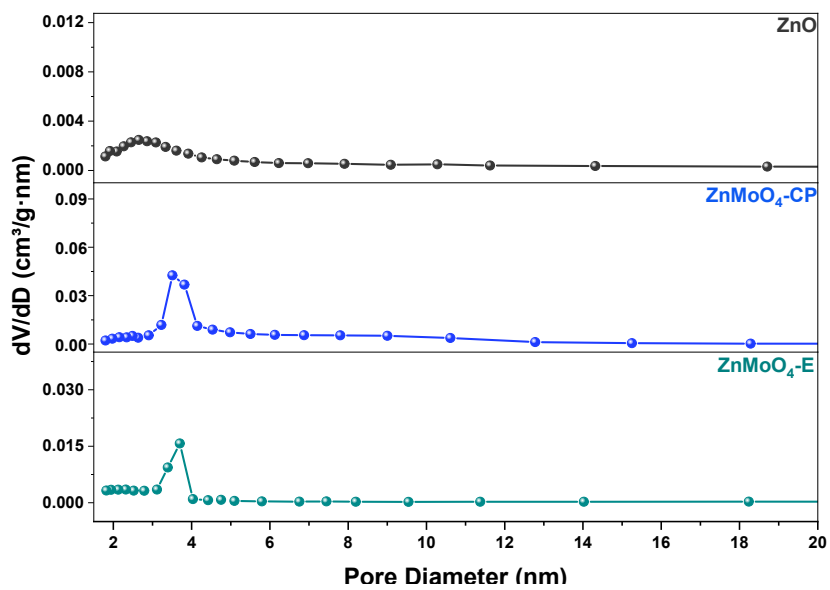

**Fig. S3.** BJH pore distribution patterns of the reduced ZnO, ZnMoO<sub>4</sub>-CP and ZnMoO<sub>4</sub>-E catalysts.

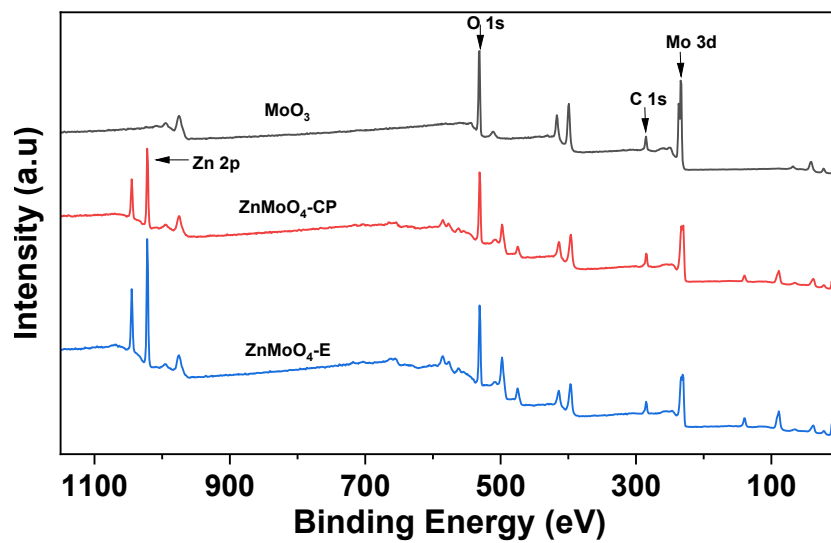

**Fig. S4.** The XPS survey of the reduced  $\text{MoO}_3$ ,  $\text{ZnMoO}_4\text{-CP}$  and  $\text{ZnMoO}_4\text{-E}$  catalysts.

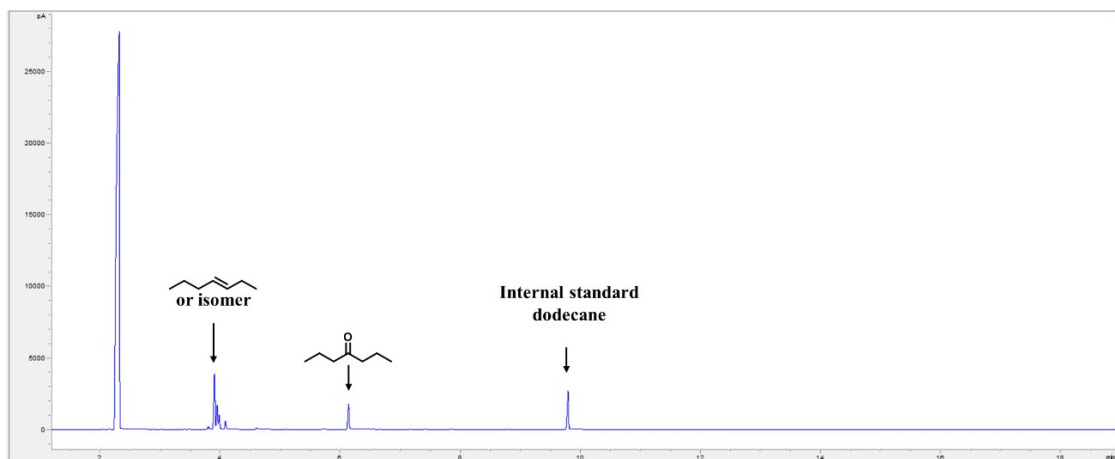

**Fig. S5.** Gas chromatogram of the products from the selective hydrodeoxygenation (HDO) of 4-heptanone over the  $\text{ZnMoO}_4\text{-E}$  catalyst. Reaction conditions:  $T = 673 \text{ K}$ ,  $P_{\text{H}_2} = 0.1 \text{ MPa}$ ,  $\text{WHSV} = 15 \text{ h}^{-1}$ , initial  $\text{H}_2/4\text{-heptanone}$  molar ratio = 9:1.



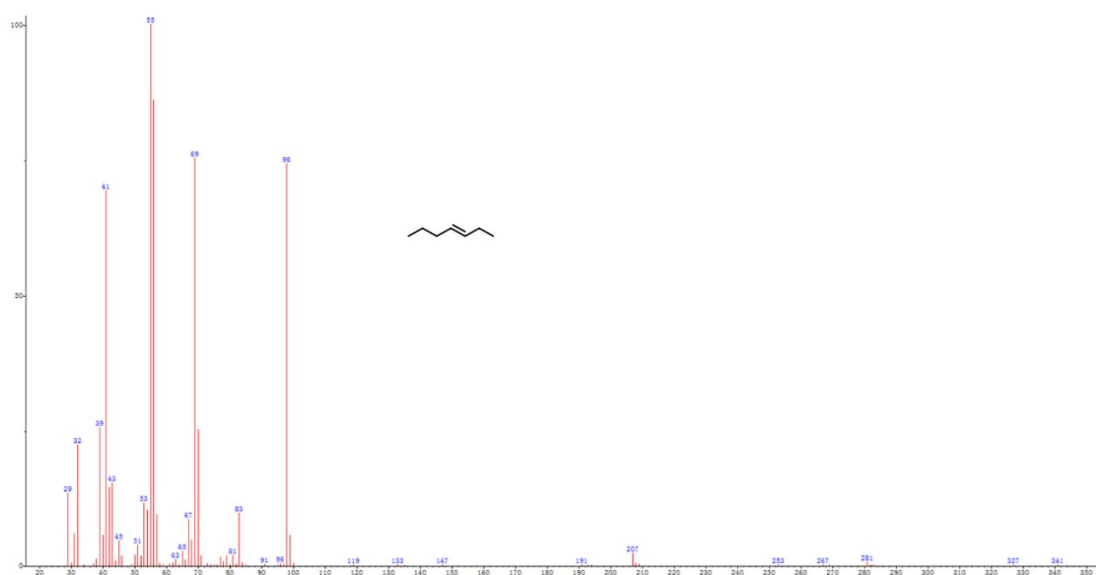

**Fig. S6.** Mass spectrogram of the heptene from the selective HDO of 4-heptanone over the  $\text{ZnMoO}_4\text{-E}$  catalyst.

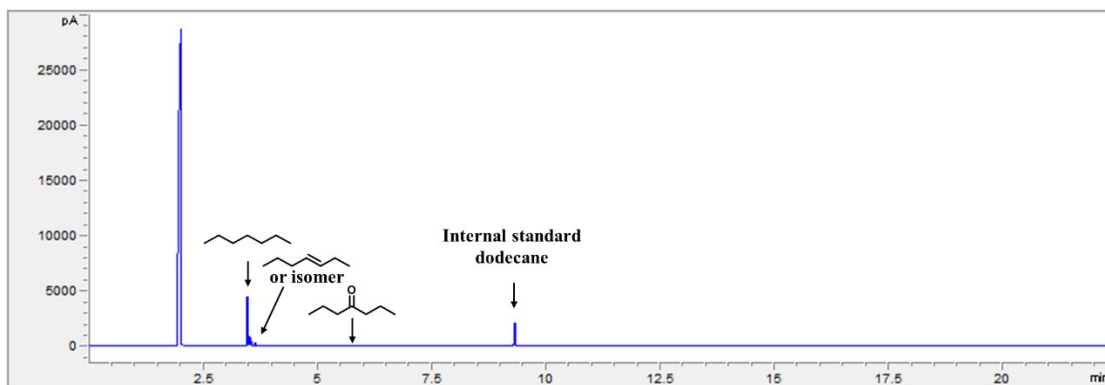

**Fig. S7.** Gas chromatogram of the products from the selective hydrodeoxygenation (HDO) of 4-heptanone over the  $\text{ZnMoO}_4\text{-E}$  catalyst. Reaction conditions:  $T = 673 \text{ K}$ ,  $P_{\text{H}_2} = 0.75 \text{ MPa}$ ,  $\text{WHSV} = 15 \text{ h}^{-1}$ , initial  $\text{H}_2/4\text{-heptanone}$  molar ratio = 39:1.

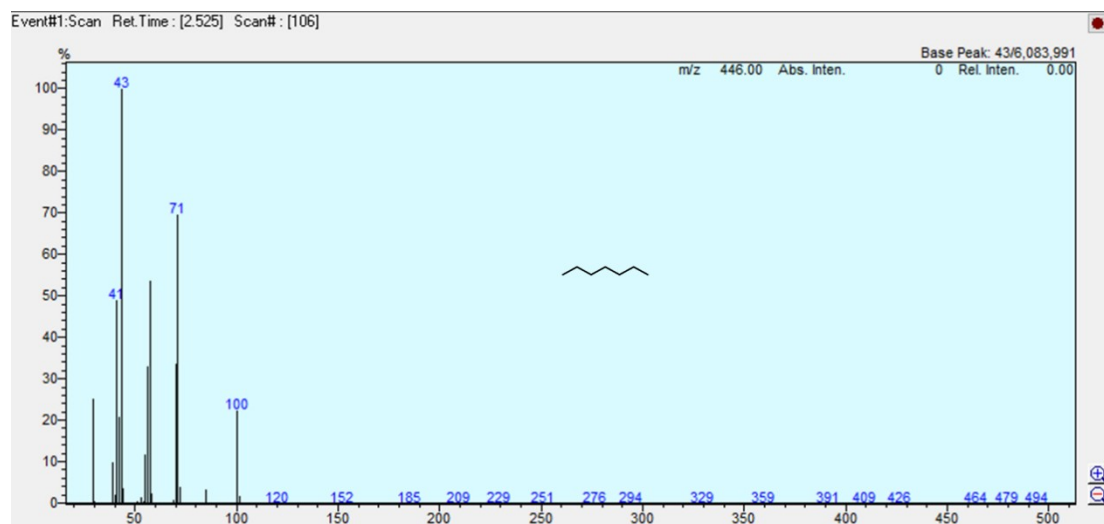

**Fig. S8.** Mass spectrogram of the heptane from the selective HDO of 4-heptanone over the  $\text{ZnMoO}_4\text{-E}$  catalyst.

**Table S2.** Conversions of 4-heptanone and the carbon yields of heptene from the selective HDO of 4-heptanone over the different catalysts.

| Catalyst                                             | Conversion (%) | Carbon yield of heptene (%) |
|------------------------------------------------------|----------------|-----------------------------|
| 15% MoO <sub>3</sub> /ZnO                            | 35             | 33                          |
| 15% MoO <sub>3</sub> /CuO                            | 29             | 26                          |
| 15% MoO <sub>3</sub> /Fe <sub>2</sub> O <sub>3</sub> | 9              | 7                           |
| 15% MoO <sub>3</sub> /Al <sub>2</sub> O <sub>3</sub> | 21             | 20                          |
| 15% MoO <sub>3</sub> /SiO <sub>2</sub>               | 20             | 18                          |

Reaction conditions:  $T = 673$  K,  $P_{\text{H}_2} = 0.1$  MPa,  $\text{WHSV} = 15 \text{ h}^{-1}$ , initial  $\text{H}_2/4\text{-heptanone}$  molar ratio = 39:1.

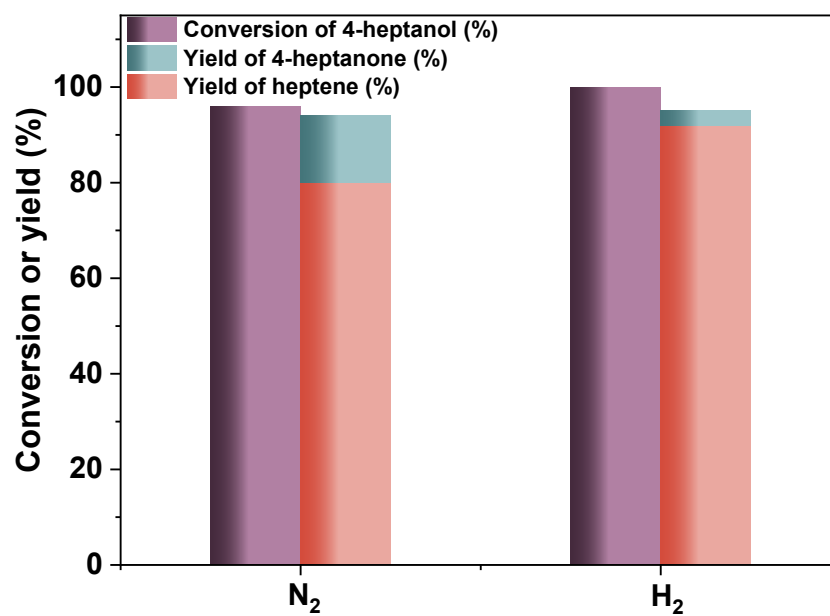

**Fig. S9.** Conversions of 4-heptanol and the carbon yields of heptene and 4-heptanone over the  $ZnMoO_4-E$  in  $N_2$  or  $H_2$  atmosphere. Reaction conditions:  $T = 673$  K,  $ZnMoO_4-E$ ,  $WHSV = 10$   $h^{-1}$ , initial  $H_2$  or  $N_2/4$ -heptanol molar ratio = 39:1.

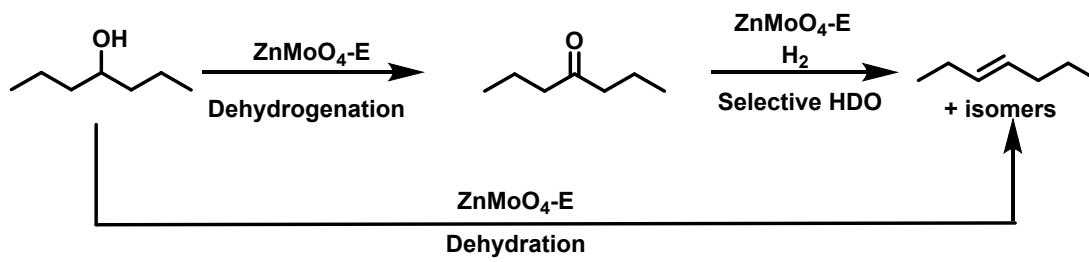

**Scheme S1.** Reaction pathway for the generation of heptene and 4-heptanone from 4-heptanol over ZnMoO<sub>4</sub>-E.

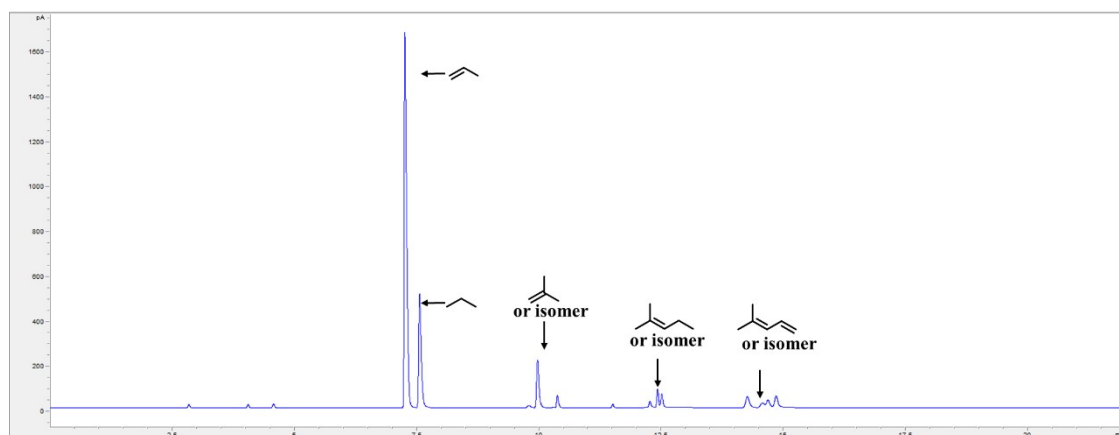

**Fig. S10.** Gas chromatogram of the products from the reaction of acetone and hydrogen over the  $\text{ZnMoO}_4\text{-E}$  catalyst. Reaction conditions:  $T = 673 \text{ K}$ ,  $P_{\text{H}_2} = 0.1 \text{ MPa}$ ,  $\text{WHSV} = 2.4 \text{ h}^{-1}$ , initial  $\text{H}_2/\text{acetone}$  molar ratio = 32:1.

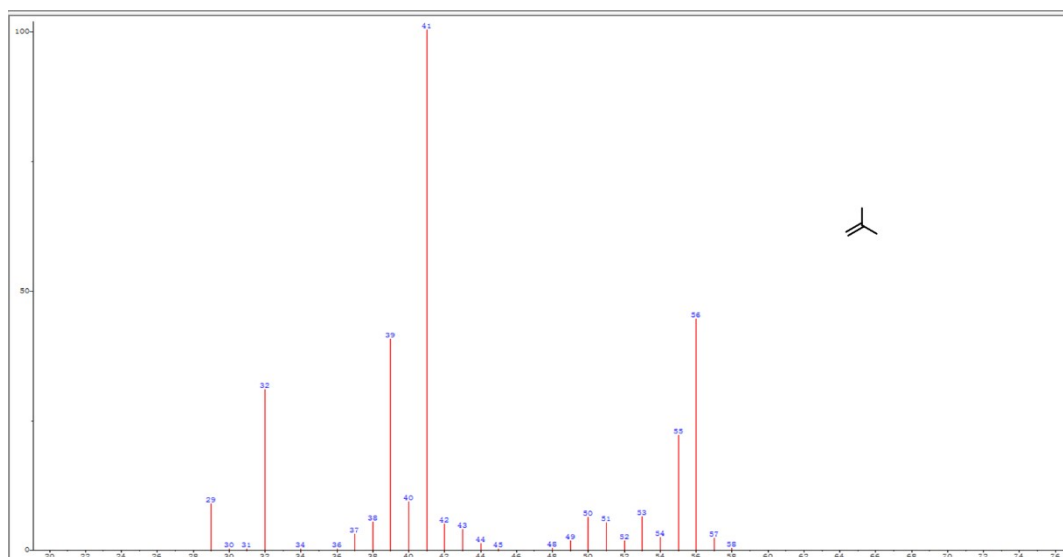

**Fig. S11.** Mass spectrogram of isobutene from the reaction of acetone and hydrogen over the ZnMoO<sub>4</sub>-E catalyst under H<sub>2</sub> atmosphere.



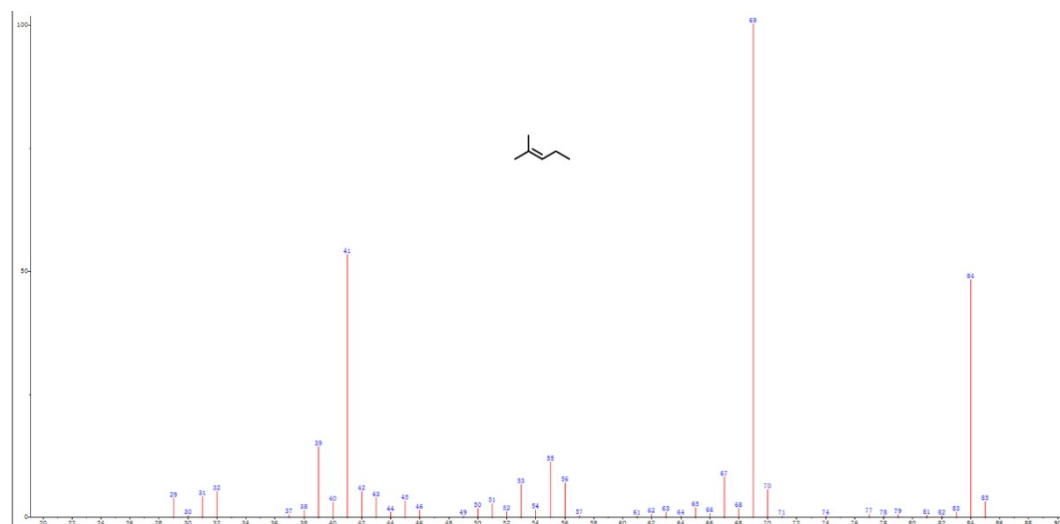

**Fig. S12.** Mass spectrogram of the methyl pentene from the reaction of acetone and hydrogen over the  $\text{ZnMoO}_4\text{-E}$  catalyst under  $\text{H}_2$  atmosphere.

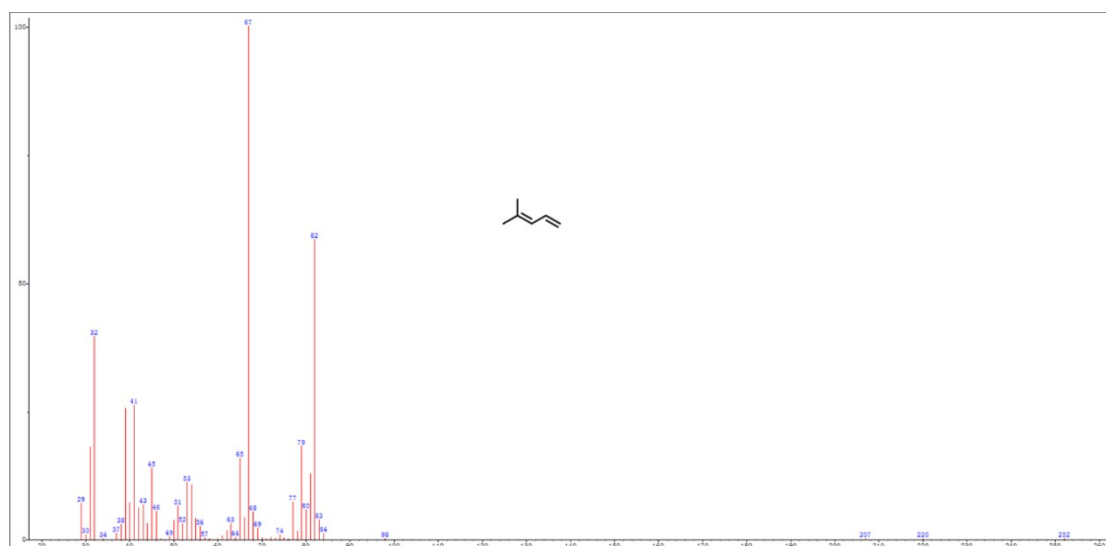

**Fig. S13.** Mass spectrogram of the methyl pentadiene from the reaction of acetone and hydrogen over the  $\text{ZnMoO}_4\text{-E}$  catalyst.

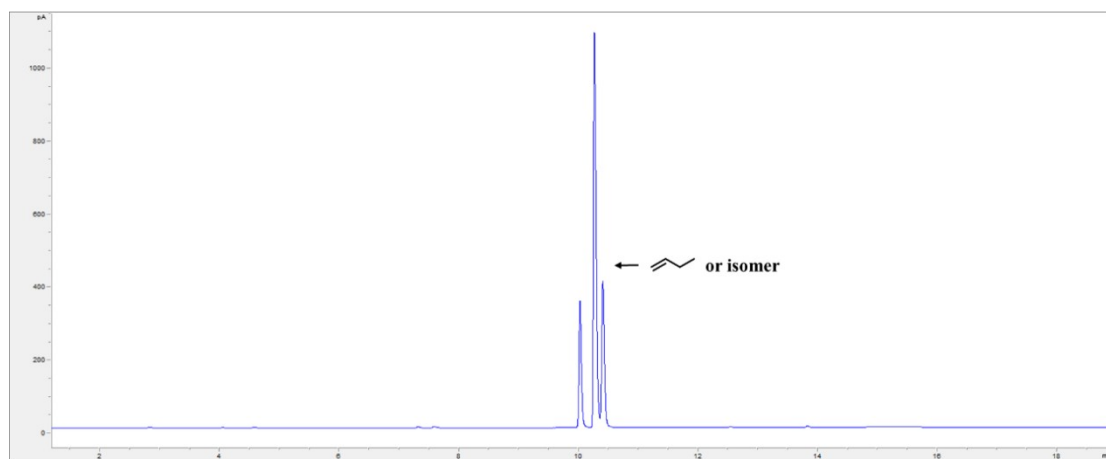

**Fig. S14.** Gas chromatogram of the products from the selective HDO of butanone over the  $\text{ZnMoO}_4\text{-E}$  catalyst. Reaction conditions:  $T = 673 \text{ K}$ ,  $P_{\text{H}_2} = 0.1 \text{ MPa}$ ,  $\text{WHSV} = 3.1 \text{ h}^{-1}$ , initial  $\text{H}_2/\text{butanone}$  molar ratio = 34:1.

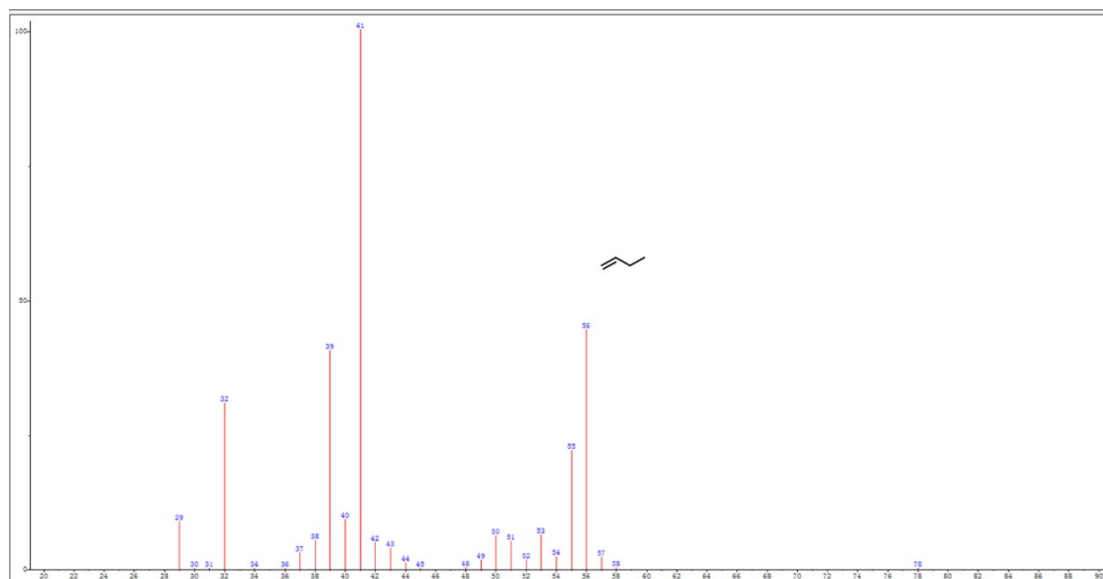

**Fig. S15.** Mass spectrogram of butene from the selective HDO of butanone over the ZnMoO<sub>4</sub>-E catalyst.

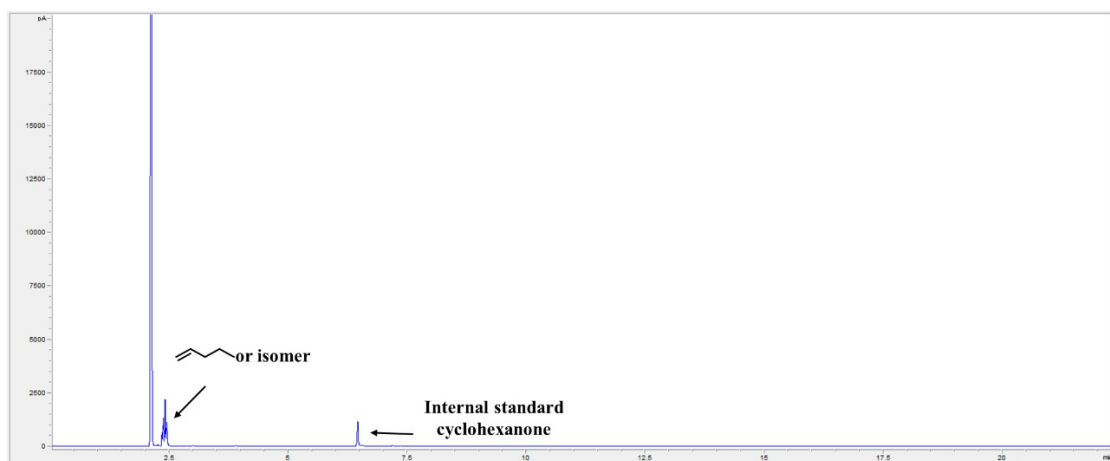

**Fig. S16.** Gas chromatogram of the products from the selective HDO of 2-pentanone over the  $\text{ZnMoO}_4\text{-E}$  catalyst. Reaction conditions:  $T = 673 \text{ K}$ ,  $P_{\text{H}_2} = 0.1 \text{ MPa}$ ,  $\text{WHSV} = 5 \text{ h}^{-1}$ , initial  $\text{H}_2/2\text{-pentanone}$  molar ratio = 52:1.

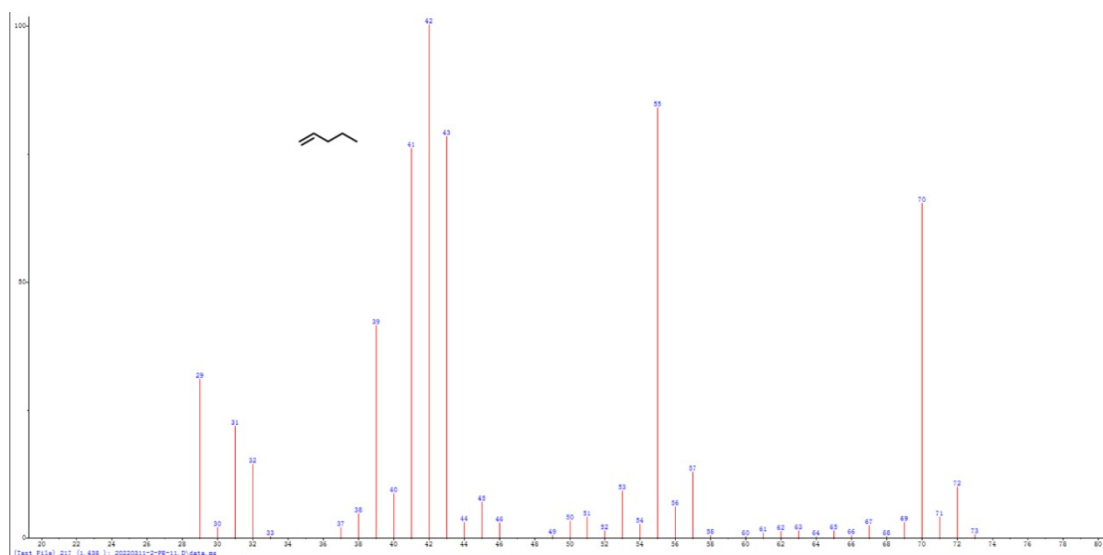

**Fig. S17.** Mass spectrogram of pentene from the selective HDO of 2-pentanone over the ZnMoO<sub>4</sub>-E catalyst.

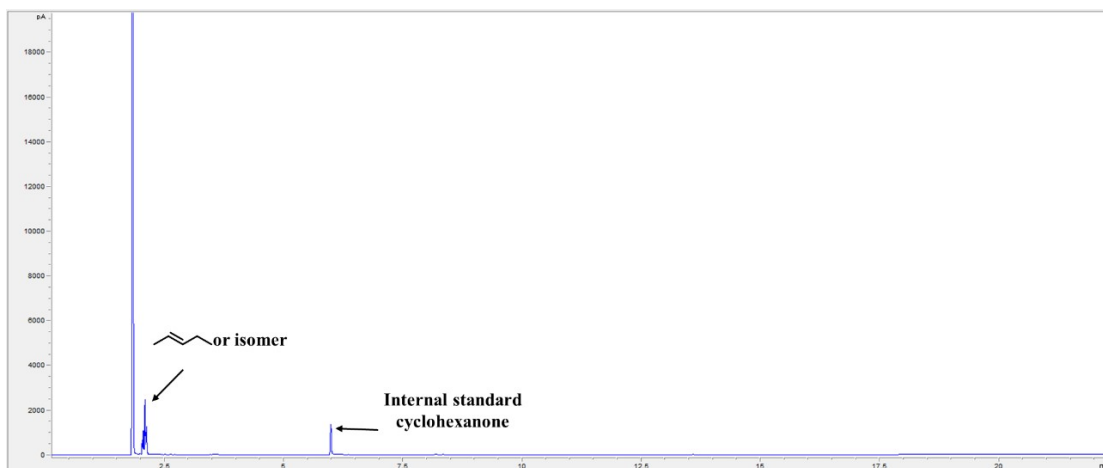

**Fig. S18.** Gas chromatogram of the products from the selective HDO of 3-pentanone over the  $\text{ZnMoO}_4\text{-E}$  catalyst. Reaction conditions:  $T = 673 \text{ K}$ ,  $P_{\text{H}_2} = 0.1 \text{ MPa}$ ,  $\text{WHSV} = 5 \text{ h}^{-1}$ , initial  $\text{H}_2/3\text{-pentanone}$  molar ratio = 40:1.

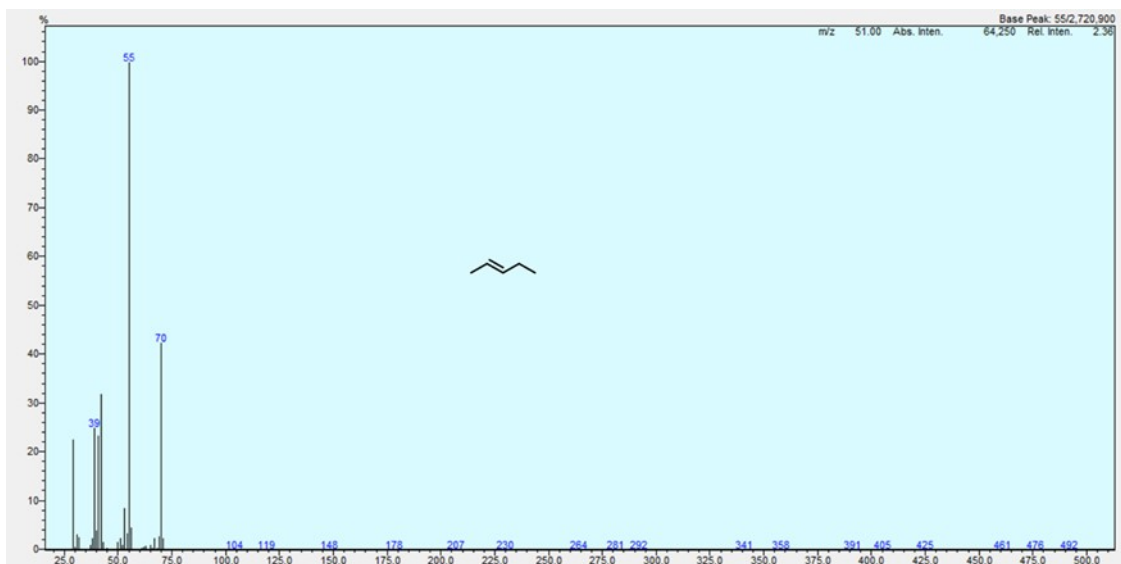

**Fig. S19.** Mass spectrogram of pentene from the selective HDO of 3-pentanone over the ZnMoO<sub>4</sub>-E catalyst.



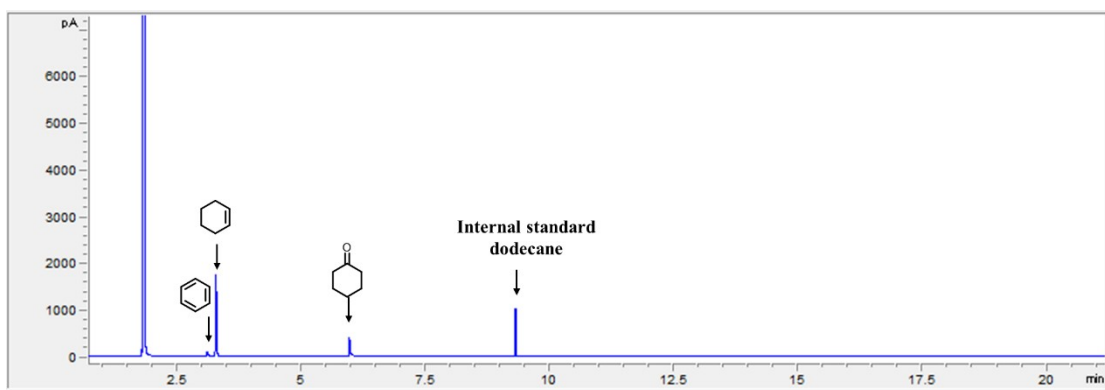

**Fig. S20.** Gas chromatogram of the products from the selective HDO of cyclohexanone over the  $\text{ZnMoO}_4\text{-E}$  catalyst. Reaction conditions:  $T = 673 \text{ K}$ ,  $P_{\text{H}_2} = 0.1 \text{ MPa}$ ,  $\text{WHSV} = 5 \text{ h}^{-1}$ , initial  $\text{H}_2/\text{cyclohexanone}$  molar ratio = 73:1.

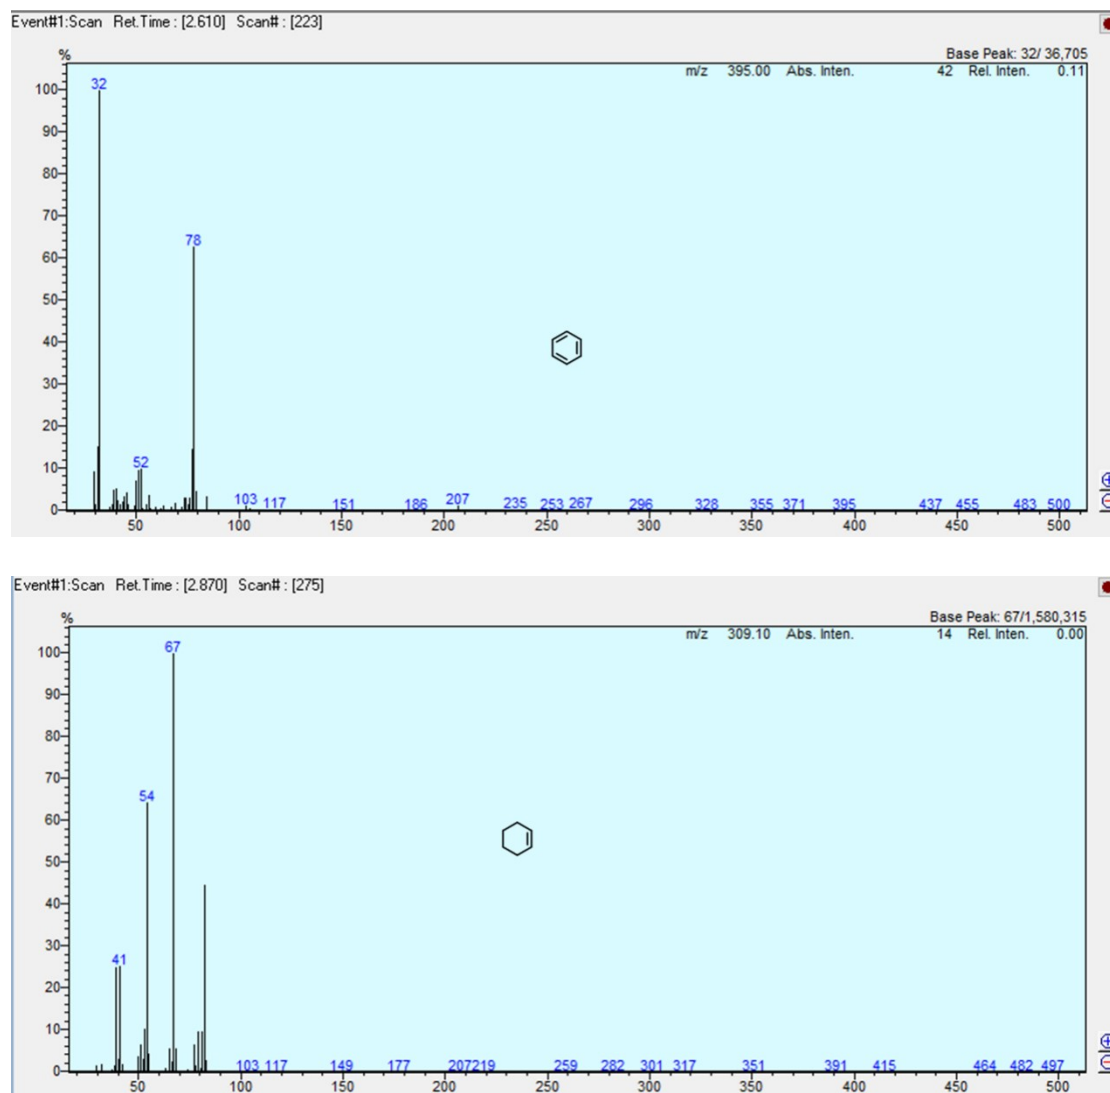

**Fig. S21.** Mass spectrograms of the benzene and cyclohexene from the selective HDO of cyclohexanone over the  $\text{ZnMoO}_4\text{-E}$  catalyst.

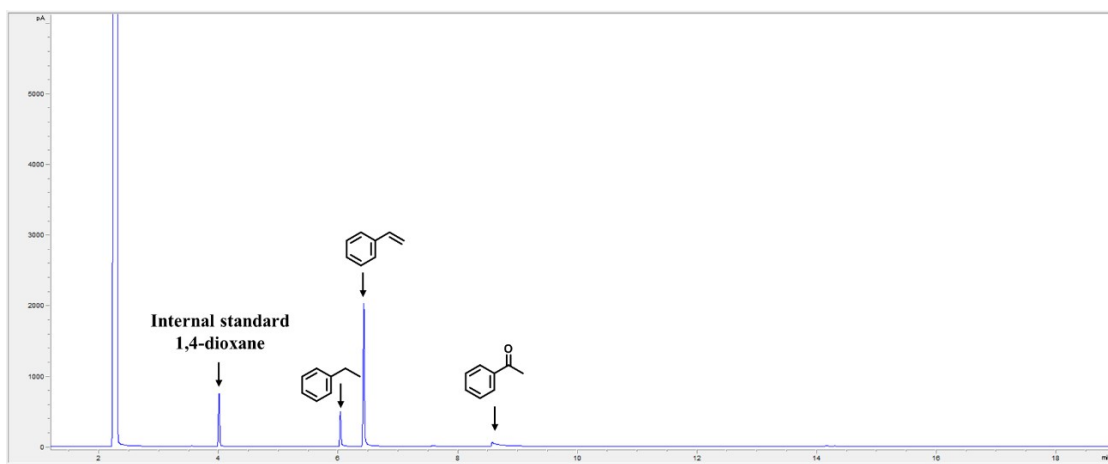

**Fig. S22.** Gas chromatogram of the products from the selective HDO of acetophenone over the  $\text{ZnMoO}_4\text{-E}$  catalyst. Reaction conditions:  $T = 633 \text{ K}$ ,  $P_{\text{H}_2} = 0.1 \text{ MPa}$ ,  $\text{WHSV} = 2.1 \text{ h}^{-1}$ , initial  $\text{H}_2/5\text{-nonanone}$  molar ratio = 38:1.

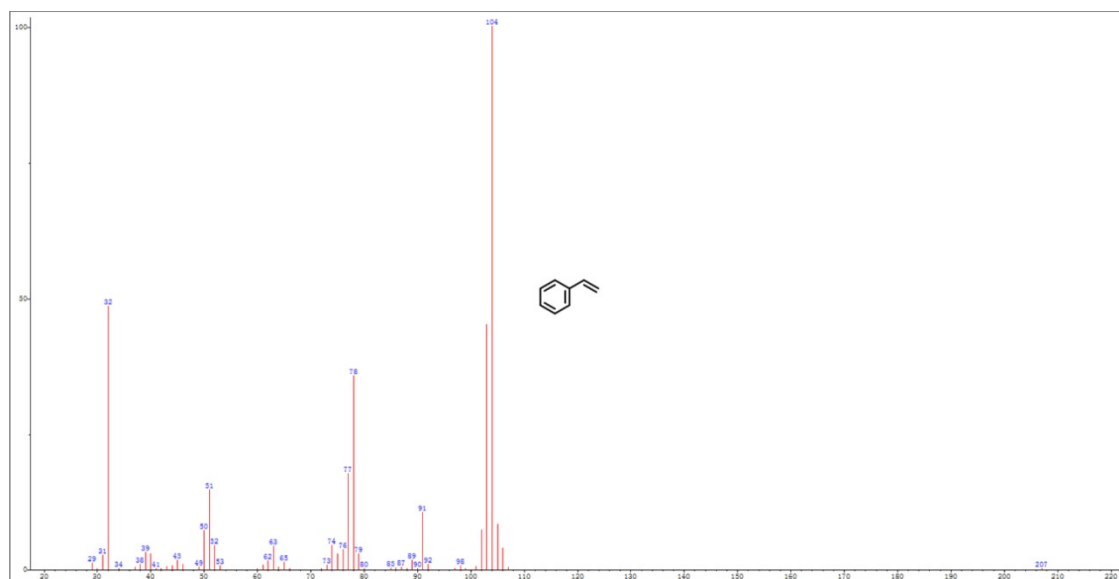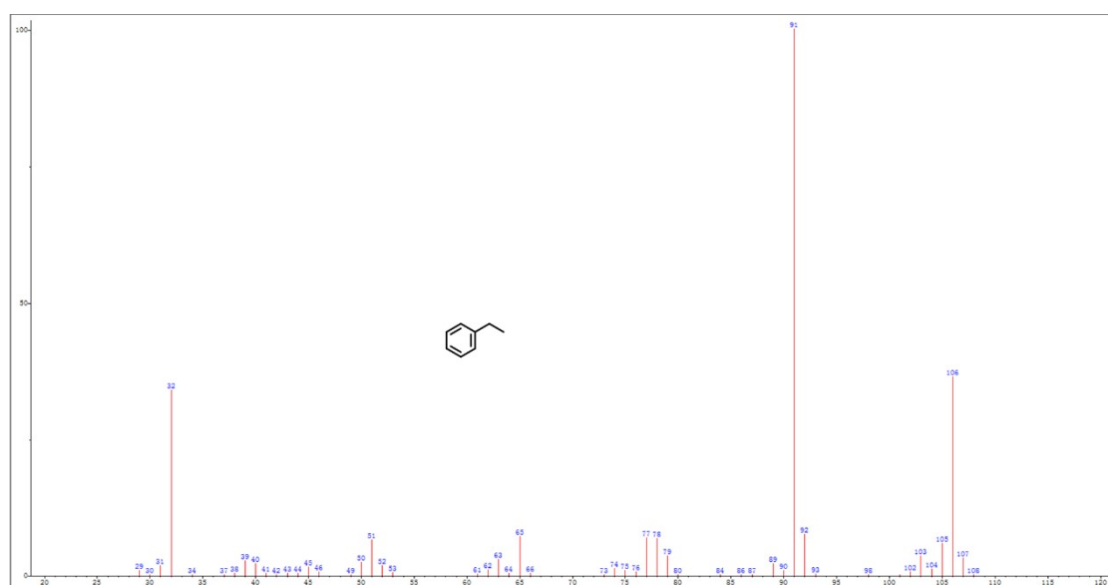

**Fig. S23.** Mass spectrograms of the styrene and ethylbenzene from the selective HDO of acetophenone over the  $\text{ZnMoO}_4\text{-E}$  catalyst.

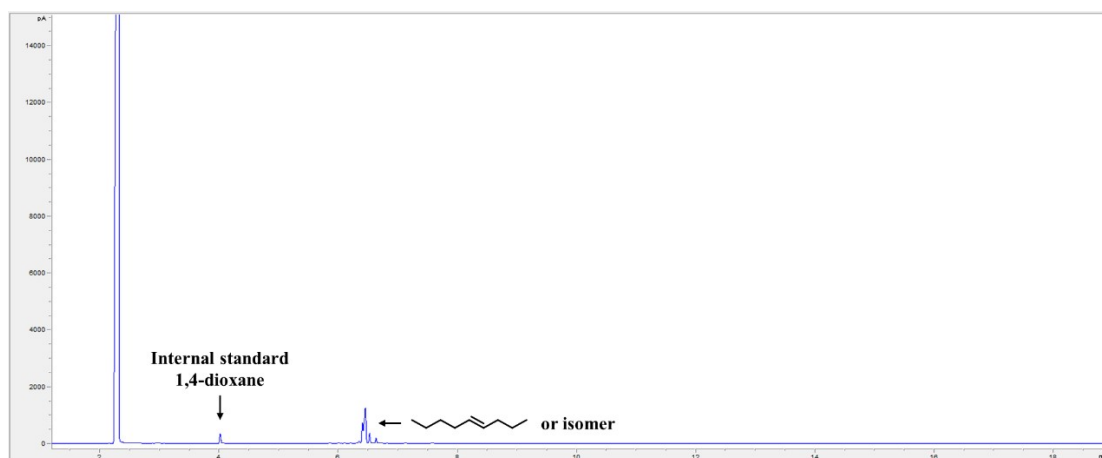

**Fig. S24.** Gas chromatogram of the products from the selective HDO of 5-nonanone over the  $\text{ZnMoO}_4\text{-E}$  catalyst. Reaction conditions:  $T = 673 \text{ K}$ ,  $P_{\text{H}_2} = 0.1 \text{ MPa}$ ,  $\text{WHSV} = 5 \text{ h}^{-1}$ , initial  $\text{H}_2/5\text{-nonanone}$  molar ratio = 40:1.

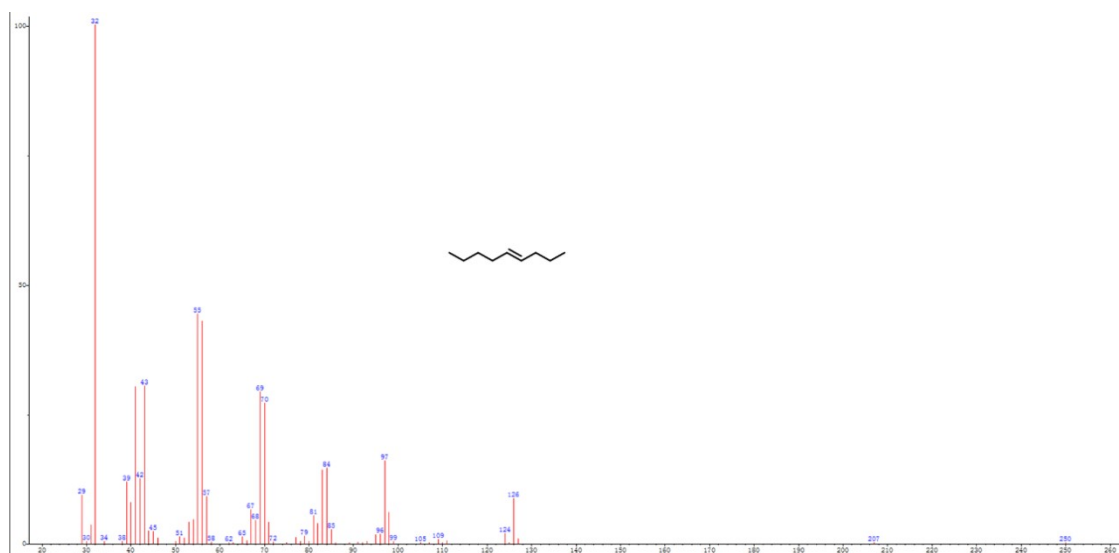

**Fig. S25.** Mass spectrogram of nonene from the selective HDO of 5-nonanone over the ZnMoO<sub>4</sub>-E catalyst.

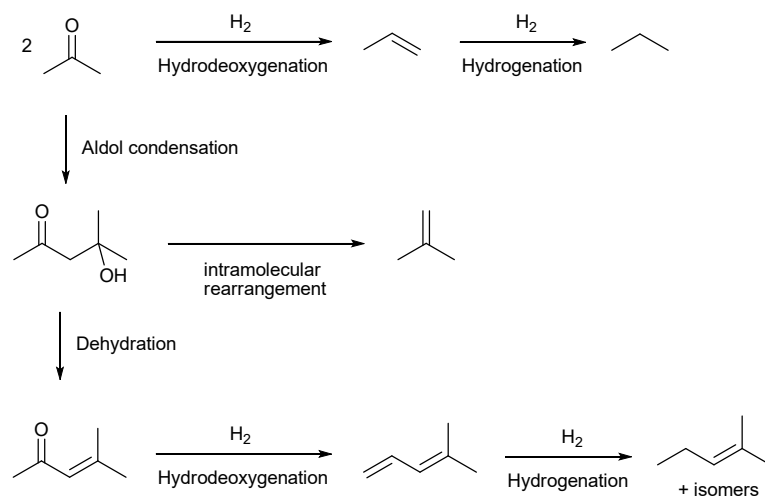

**Scheme S2.** Reaction pathways for the generation of different products from the reaction of acetone and hydrogen over the  $\text{ZnMoO}_4\text{-E}$  catalyst.

## References

1. C. Peng, L. Gao, S. Yang and J. Sun, *Chem. Commun.*, 2008, 5601.
